# Supplementary material for: Pancreatoduodenectomy with portal vein resection favors the survival time of patients with pancreatic ductal adenocarcinoma: A propensity score matching analysis
Source: PubMed Central journal article supplement — Oncol Lett. 2019 Sep 6;18(5):4563–72. doi: 10.3892/ol.2019.10822 (PMC6781555; doi:10.3892/ol.2019.10822), 2019-09-06
Supplement: Supplementary_Data.pdf [file Supplementary_Data.pdf]

Figure S1. Subgroup analysis in the PVR group before propensity score matching. Subgroup analysis in PVR group for various factors, including (A) PV invasion, (B) TNM stage, (C) LN metastasis, (D) BMI (kg/m<sup>2</sup>), (E) ALB (g/l), (F) R1 resection (microscopic positive margin), (G) CA 125 (U/ml) and (H) CA 19-9 (U/ml) before propensity score matching. PV, portal vein; PVR, portal vein resection; TNM, Tumor-Node-Metastasis; BMI, body mass index; ALB, albumin; CA 125, carbohydrate antigen 125; CA 19-9, carbohydrate antigen 19-9; LN, lymph node.

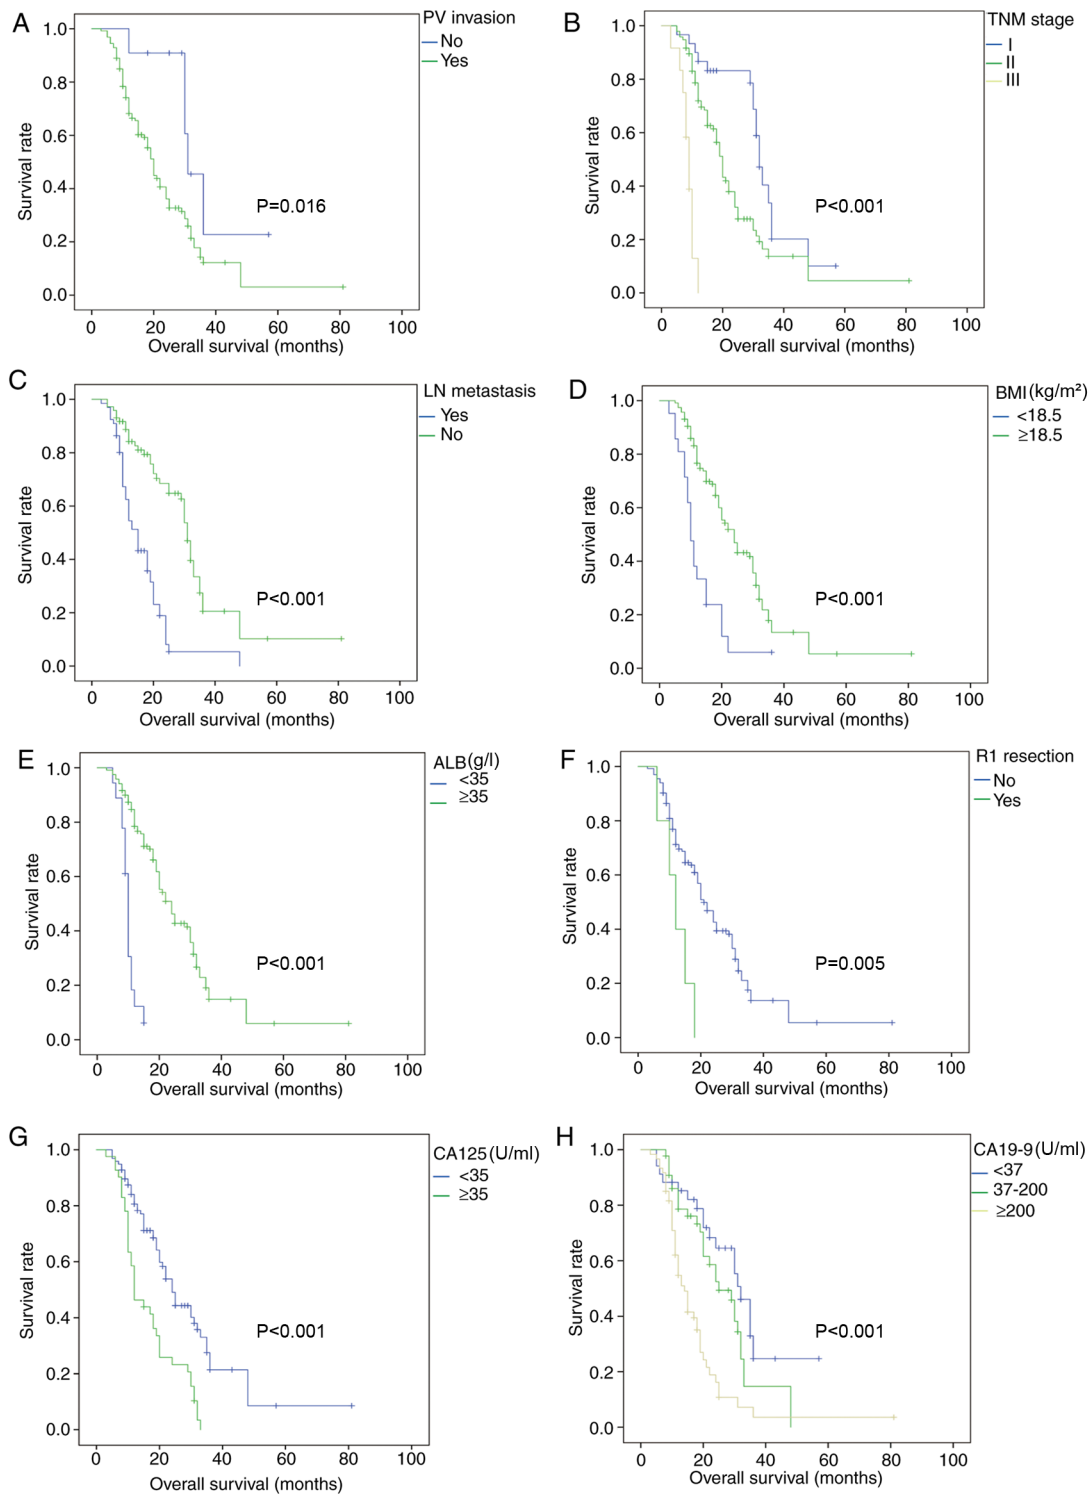

Figure S2. Subgroup analysis in the PVR group after propensity score matching. Subgroup analysis for various factors, including (A) PV invasion, (B) TNM stage, (C) LN metastasis, (D) BMI ( $\text{kg}/\text{m}^2$ ), (E) ALB ( $\text{g}/\text{l}$ ), (F) R1 resection (microscopic positive margin), (G) CA 125 ( $\text{U}/\text{ml}$ ) and (H) CA 19-9 ( $\text{U}/\text{ml}$ ) after propensity score matching. PV, portal vein; PVR, portal vein resection; TNM, Tumor-Node-Metastasis; BMI, body mass index; ALB, albumin; CA 125, carbohydrate antigen 125; CA 19-9, carbohydrate antigen 19-9; LN, lymph node.

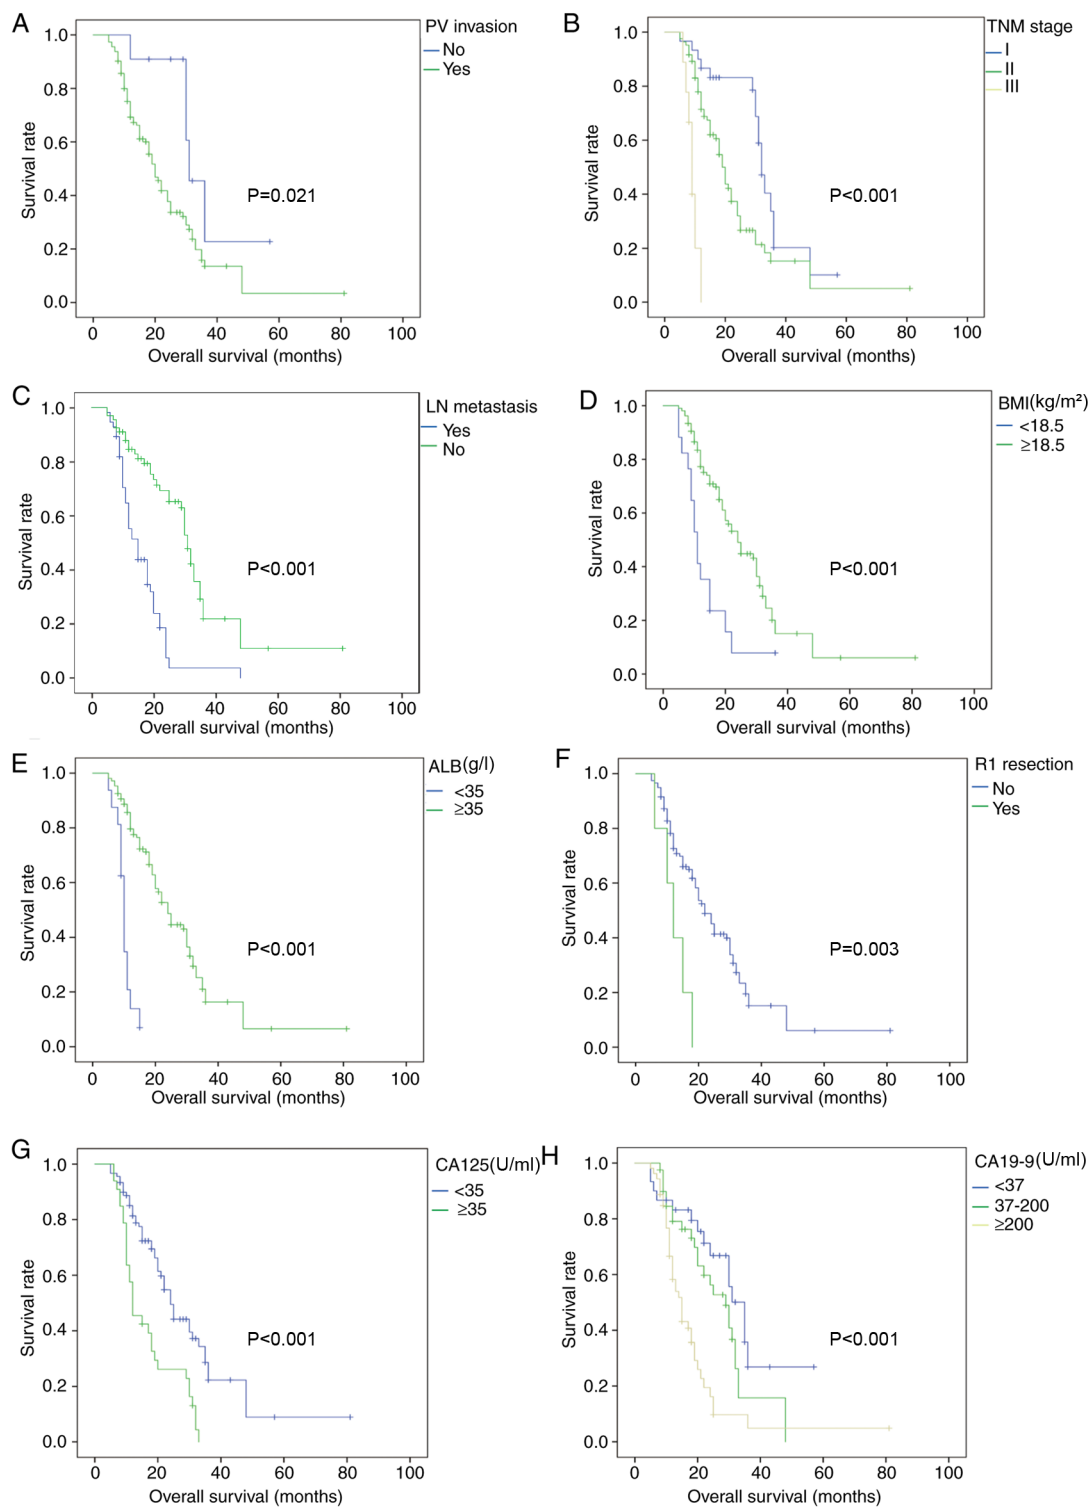

Figure S3. Subgroup analysis in the non-PVR group before propensity score matching. Subgroup analysis for various factors, including (A) TNM stage, (B) LN metastasis, (C) BMI (kg/m<sup>2</sup>), (D) ALB (g/l), (E) R1 resection (microscopic positive margin), (F) CA 125 (U/ml) and (G) CA 19-9 (U/ml) before propensity score matched. PV, portal vein; PVR, portal vein resection; TNM, Tumor-Node-Metastasis; BMI, body mass index; ALB, albumin; CA 125, carbohydrate antigen 125; CA 19-9, carbohydrate antigen 19-9; LN, lymph node.

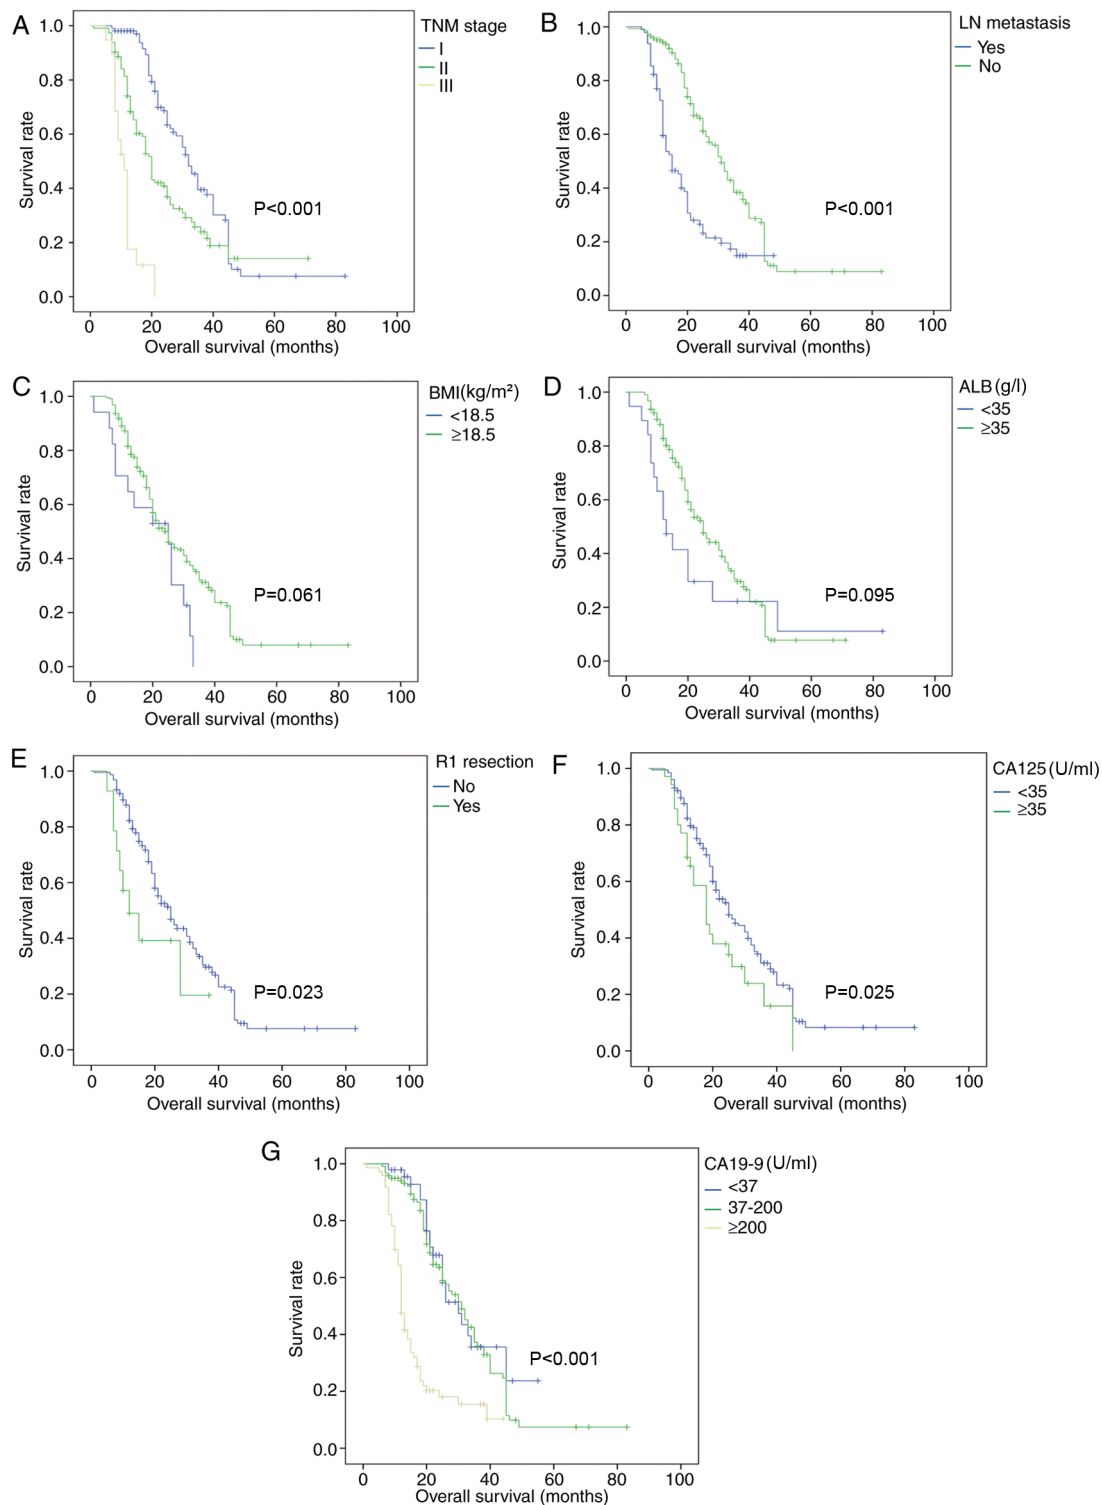

Figure S4. Subgroup analysis in the non-PVR group after propensity score matching. Subgroup analysis for various factors, including (A) TNM stage, (B) LN metastasis, (C) BMI (kg/m<sup>2</sup>), (D) ALB (g/l), (E) R1 resection (microscopic positive margin), (F) CA 125 (U/ml) and (G) CA 19-9 (U/ml) after propensity score matching. PV, portal vein; PVR, portal vein resection; TNM, Tumor-Node-Metastasis; BMI, body mass index; ALB, albumin; CA 125, carbohydrate antigen 125; CA 19-9, carbohydrate antigen 19-9; LN, lymph node.

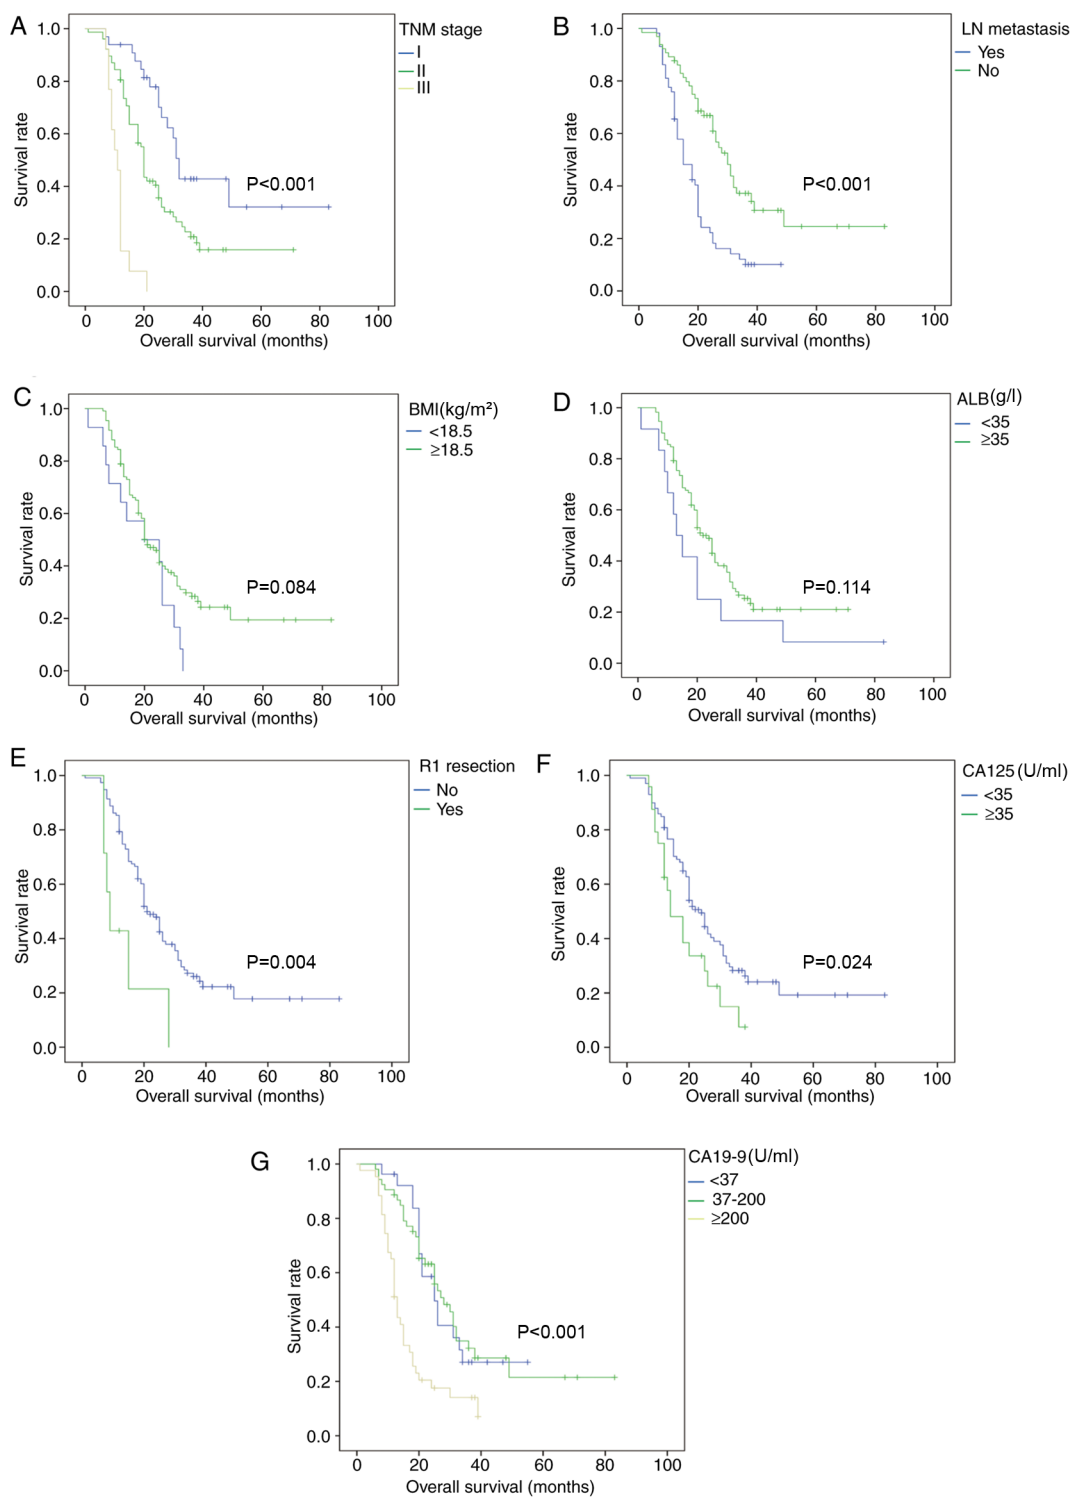

Table S1. Subgroup analysis of the PVR group.

| Risk factors           | Before PSM |             |         |                                        | After PSM |             |         |                                        |
|------------------------|------------|-------------|---------|----------------------------------------|-----------|-------------|---------|----------------------------------------|
|                        | HR         | 95% CI      | P-value | Overall survival<br>Months (mean ± SD) | HR        | 95% CI      | P-value | Overall survival<br>Months (mean ± SD) |
| PV invasion            |            |             |         |                                        |           |             |         |                                        |
| Yes                    | 2.771      | 1.123-6.838 | 0.010   | 26.368±1.775<br>36.015±5.064           | 2.694     | 1.087-6.677 | 0.032   | 23.994±1.956<br>36.015±5.064           |
| No                     |            |             |         |                                        |           |             |         |                                        |
| TNM stage              |            |             |         |                                        |           |             |         |                                        |
| Stage I                | 3.335      | 2.042-5.449 | <0.001  | 32.894±2.790                           | 2.972     | 1.794-4.926 | <0.001  | 32.894±2.790                           |
| Stage II               |            |             |         | 23.930±2.278                           |           |             |         | 24.200±2.541                           |
| Stage III              |            |             |         | 8.565±0.729                            |           |             |         | 9.133±0.719                            |
| BMI, kg/m <sup>2</sup> |            |             |         |                                        |           |             |         |                                        |
| <18.5                  | 0.34       | 0.203-0.569 | <0.001  | 12.833±1.745                           | 0.355     | 0.201-0.629 | <0.001  | 13.529±2.047                           |
| ≥18.5                  |            |             |         | 26.688±2.061                           |           |             |         | 27.488±2.267                           |
| R1 resection           |            |             |         |                                        |           |             |         |                                        |
| No                     | 3.371      | 1.340-8.477 | 0.01    | 25.624±1.995                           | 3.581     | 1.413-9.073 | 0.007   | 26.532±2.193                           |
| Yes                    |            |             |         | 12.200±2.059                           |           |             |         | 12.200±2.059                           |
| LN metastasis          |            |             |         |                                        |           |             |         |                                        |
| Yes                    | 0.268      | 0.170-0.421 | <0.001  | 16.438±1.336                           | 0.27      | 0.166-0.437 | <0.001  | 16.259±1.322                           |
| No                     |            |             |         | 32.931±3.161                           |           |             |         | 33.451±3.360                           |
| ALB, g/l               |            |             |         |                                        |           |             |         |                                        |
| <35                    | 0.153      | 0.082-0.287 | <0.001  | 9.967±0.622                            | 0.149     | 0.076-0.292 | <0.001  | 10.097±0.693                           |
| ≥35                    |            |             |         | 27.137±2.117                           |           |             |         | 27.993±2.313                           |
| CA 125, U/ml           |            |             |         |                                        |           |             |         |                                        |
| <35                    | 2.494      | 1.632-3.811 | <0.001  | 29.671±2.820                           | 2.532     | 1.593-4.023 | <0.001  | 30.095±2.945                           |
| ≥35                    |            |             |         | 16.659±1.451                           |           |             |         | 16.836±1.646                           |
| CA 19-9, U/ml          |            |             |         |                                        |           |             |         |                                        |
| <37                    | 1.945      | 1.468-2.579 | <0.001  | 32.488±3.417                           | 1.931     | 1.421-2.624 | <0.001  | 33.244±3.726                           |
| 37-200                 |            |             |         | 26.219±2.124                           |           |             |         | 26.670±2.273                           |
| >200                   |            |             |         | 17.794±2.276                           |           |             |         | 18.908±2.760                           |

BMI, body mass index; SD, standard deviation; HR, hazard ratio; CI, confidence interval; TNM, Tumor-Node-Metastasis; PSM, propensity score matching; PVR, portal vein resection; ALB, albumin; CA 125, carbohydrate antigen 125; CA 19-9, carbohydrate antigen 19-9; LN, lymph node.

Table SII. Subgroup analysis of the non-PVR group.

| Risk factors           | Before PSM              |              |                  |                    | After PSM               |       |                  |         |                    |         |
|------------------------|-------------------------|--------------|------------------|--------------------|-------------------------|-------|------------------|---------|--------------------|---------|
|                        | Cox regression analysis |              | Overall survival |                    | Cox regression analysis |       | Overall survival |         |                    |         |
|                        | HR                      | 95% CI       | P-value          | Months (mean ± SD) | P-value                 | HR    | 95% CI           | P-value | Months (mean ± SD) | P-value |
| TNM                    |                         |              |                  |                    |                         |       |                  |         |                    |         |
| Stage I                | 2.448                   | 1.850– 3.239 | <0.001           | 34.971±2.120       | <0.001                  | 3.058 | 1.994-4.691      | <0.001  | 45.521±5.812       | <0.001  |
| Stage II               |                         |              |                  | 27.201±2.434       |                         |       |                  |         | 27.413±2.626       |         |
| Stage III              |                         |              |                  | 11.275±1.025       |                         |       |                  |         | 11.231±1.020       |         |
| BMI, kg/m <sup>2</sup> |                         |              |                  |                    |                         |       |                  |         |                    |         |
| <18.5                  | 0.598                   | 0.343-1.041  | 0.069            | 19.937±2.729       | 0.061                   | 0.603 | 0.333-1.093      | 0.095   | 19.190±2.943       | 0.084   |
| ≥18.5                  |                         |              |                  | 29.977±1.724       |                         |       |                  |         | 32.961±3.111       |         |
| R1 resection           |                         |              |                  |                    |                         |       |                  |         |                    |         |
| No                     | 2.128                   | 1.080-4.192  | 0.029            | 29.757±1.659       | 0.023                   | 3.161 | 1.361-7.341      | 0.007   | 32.165±2.897       | 0.004   |
| Yes                    |                         |              |                  | 18.469±3.448       |                         |       |                  |         | 13.643±3.558       |         |
| LN metastasis          |                         |              |                  |                    |                         |       |                  |         |                    |         |
| Yes                    | 0.377                   | 0.271-0.524  | <0.001           | 20.337±1.512       | <0.001                  | 0.4   | 0.258-0.619      | <0.001  | 19.303±1.616       | <0.001  |
| No                     |                         |              |                  | 34.248±2.014       |                         |       |                  |         | 38.975±4.128       |         |
| ALB, g/l               |                         |              |                  |                    |                         |       |                  |         |                    |         |
| <35                    | 0.647                   | 0.378-1.107  | 0.112            | 24.457±6.157       | 0.095                   | 0.607 | 0.320-1.150      | 0.125   | 22.250±6.293       | 0.114   |
| ≥35                    |                         |              |                  | 28.961±1.391       |                         |       |                  |         | 30.694±2.387       |         |
| CA 125, U/ml           |                         |              |                  |                    |                         |       |                  |         |                    |         |
| <35                    | 1.61                    | 1.046-2.478  | 0.03             | 30.366±1.786       | 0.025                   | 1.769 | 1.056-2.963      | 0.03    | 33.281±3.175       | 0.024   |
| ≥35                    |                         |              |                  | 21.924± 2.449      |                         |       |                  |         | 18.927±2.149       |         |
| CA 19-9, U/ml          |                         |              |                  |                    |                         |       |                  |         |                    |         |
| <37                    | 2.365                   | 1.797-3.111  | <0.001           | 33.498±2.708       | <0.001                  | 1.856 | 1.345-2.561      | <0.001  | 31.353±3.193       | <0.001  |
| 37-200                 |                         |              |                  | 33.212±2.032       |                         |       |                  |         | 37.090±4.349       |         |
| >200                   |                         |              |                  | 17.218±1.480       |                         |       |                  |         | 16.553±1.680       |         |

BMI, body mass index; SD, standard deviation; HR, hazard ratio; CI, confidence interval; TNM, Tumor-Node-Metastasis; PSM, propensity score matching; PVR, portal vein resection; ALB, albumin; CA 125, carbohydrate antigen 125; CA 19-9, carbohydrate antigen 19-9; LN, lymph node.
